# Supplementary material for: Lysine Acetyltransferase p300/CBP Plays an Important Role in Reproduction, Embryogenesis and Longevity of the Pea Aphid Acyrthosiphon pisum
Source: PubMed Central journal article supplement (PMC7290403; doi:10.3390/insects11050265), 2020-04-26
Supplement: insects-11-00265-s001.pdf [file insects-11-00265-s001.pdf]

## Supplementary material

*Article*

# **Lysine Acetyltransferase p300/CBP Plays an Important Role in Reproduction, Embryogenesis and Longevity of the Pea Aphid *Acyrtosiphon pisum***

**Phillipp Kirfel <sup>1</sup>, Andreas Vilcinskas <sup>1,2</sup> and Marisa Skaljac <sup>1,\*</sup>**

<sup>1</sup> Fraunhofer Institute for Molecular Biology and Applied Ecology (IME), Branch for Bioresources, Ohlebergsweg 12, 35392 Giessen, Germany; phillipp.kirfel@ime.fraunhofer.de

<sup>2</sup> Institute for Insect Biotechnology, Justus-Liebig University of Giessen, Heinrich-Buff-Ring 26-32, 35392 Giessen, Germany; andreas.vilcinskas@agrar.uni-giessen.de

\* Correspondence: marisa.skaljac82@gmail.com; Tel.: +49-641-9937747

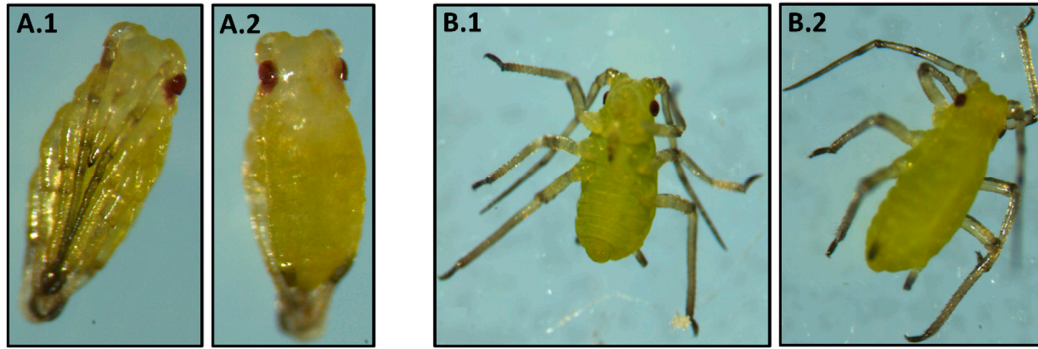

**Figure S1.** Nymphs of *p300/CBP* dsRNA treated mothers. A prematurely born nymph (A) in ventral (A.1) and dorsal (A.2) view. The legs and antenna remain unfolded and the nymphs die after eclosion. In comparison, a viable nymph (B) in ventral (B.1) and dorsal (B.2) view.

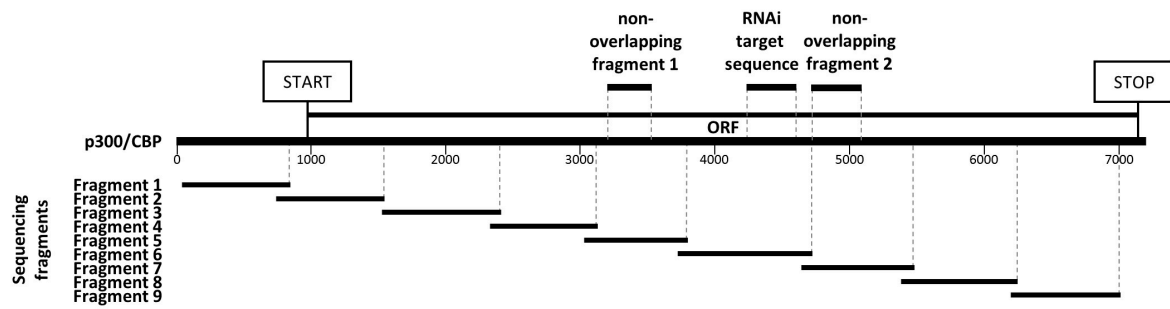

**Figure S2.** The *A. pisum* *p300/CBP* mRNA sequence from clone LL01 contains the 5'-UTR, start codon and most of the open reading frame (ORF), but the stop codon and 3'-UTR were not represented in our assembly (Tab. S1). The RNAi target site is also shown. Additional RNAi target sites used in this study are indicated as non-overlapping fragments 1 and 2.

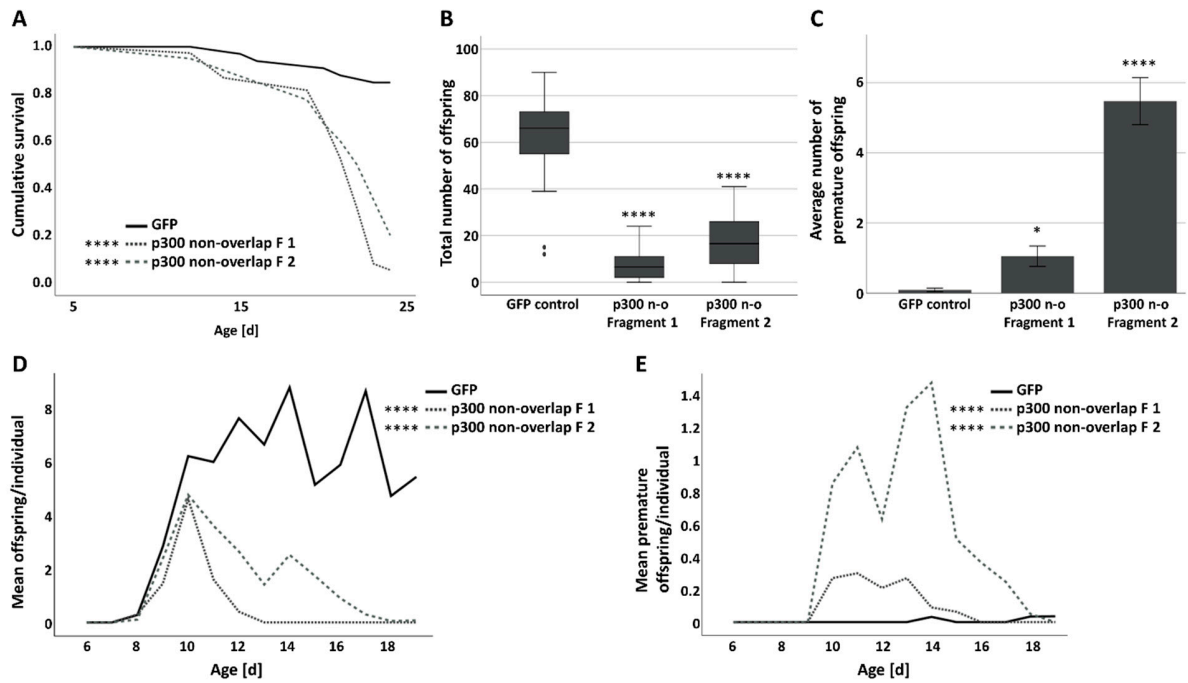

**Figure S3:** Life history parameters following the RNAi-mediated silencing of p300/CBP with the additionally tested non-overlapping fragments (called p300 non-overlap F1 and p300 non-overlap F2) as specified in Figure S2. We injected 40 individuals each with 25nl of a 3000 ng/ $\mu$ l solution. (A) survival, (B) total number of offspring, (C) average number of premature offspring, (D) number of viable offspring per day and (E) number of premature offspring per day is shown. Significances were tested using (A) the log-rank test, (B,C) the Kruskal-Wallis-test followed by Bonferroni corrections for pairwise analysis ( $*p < 0.05$ ,  $****p < 0.0001$ ) and (D,E) two-way-ANOVA ( $****p < 0.000001$ ).

**Table S1.** Primer sequences used in this study.

|                            | Primer name         | Accession No. and residues (nt) sequences | Sequence                                       | Frag. size (bp) | purpose                         |
|----------------------------|---------------------|-------------------------------------------|------------------------------------------------|-----------------|---------------------------------|
| <b>Fragment1</b>           | seq_AP_p300_fwd_1   | MN734788                                  | 5'CTG ACC TTG GAC CGT GAG TT3'                 | 807             | sequencing                      |
|                            | seq_AP_p300_rev_1   | nt1 – nt807                               | 5'CAA ATT GAG AAA CAA AAT AGT TAA ACA3'        |                 |                                 |
| <b>Fragment2</b>           | seq_AP_p300_fwd_2   | MN734788                                  | 5'AAT CAG CCT CCG ACT TAG CA3'                 | 856             | sequencing                      |
|                            | seq_AP_p300_rev_2   | nt700 – nt1555                            | 5'CTG GTT GCG AAT TTG TTG TG3'                 |                 |                                 |
| <b>Fragment3</b>           | seq_AP_p300_fwd_3   | MN734788                                  | 5'AGC AAC AAC AAA ACG GAC CT3'                 | 887             | sequencing                      |
|                            | seq_AP_p300_rev_3   | nt1485 – nt2371                           | 5'TAC CTG GGG TTG TGA ATG TG3'                 |                 |                                 |
| <b>Fragment4</b>           | seq_AP_p300_fwd_4   | MN734788                                  | 5'CTC AAA TGC CAC ATC CTC CT3'                 | 801             | sequencing                      |
|                            | seq_AP_p300_rev_4   | nt2286 – nt3086                           | 5'TTG GAA AAT GTA CCC TGT CTG A3'              |                 |                                 |
| <b>Fragment5</b>           | seq_AP_p300_fwd_5   | MN734788                                  | 5'TCA ATT CAA CCC AAT CAG CA3'                 | 769             | sequencing                      |
|                            | seq_AP_p300_rev_5   | nt2990 – nt3758                           | 5'CCA TTT TCT TTG AAC TTG AAC CA3'             |                 |                                 |
| <b>Fragment6</b>           | seq_AP_p300_fwd_6   | MN734788                                  | 5'AAC ACC GTC GGC ATC TGT GA3'                 | 1002            | sequencing                      |
|                            | seq_AP_p300_rev_6   | nt3685 – nt4687                           | 5'AGC AAC TTC ACC AGC GCC TG3'                 |                 |                                 |
| <b>Fragment7</b>           | seq_AP_p300_fwd_7   | MN734788                                  | 5'ATT GGC TAT AAC AAA ATT AGG TAC G3'          | 839             | sequencing                      |
|                            | seq_AP_p300_rev_7   | nt4600 – nt5438                           | 5'TGC TCT TTC TCT GGC TGG AC3'                 |                 |                                 |
| <b>Fragment8</b>           | seq_AP_p300_fwd_8   | MN734788                                  | 5'GAA GTT GAA ATT GGC CCT GA3'                 | 865             | sequencing                      |
|                            | seq_AP_p300_rev_8   | nt5351 – nt6215                           | 5'GCT GTG CTT GTT GCA GTC TT3'                 |                 |                                 |
| <b>Fragment9</b>           | seq_AP_p300_fwd_9   | MN734788                                  | 5'TGT CCA GTG TTG TTC TGT CCA3'                | 811             | sequencing                      |
|                            | seq_AP_p300_rev_9   | nt6137 – nt6947                           | 5'GGA ACA TTT GCC TTT GTC GT3'                 |                 |                                 |
| <b>Assembly</b>            | Fragment1-Fragment9 | MN734788                                  |                                                |                 | Assembling                      |
| <b>Reference sequences</b> | Protein             | XP_008187184                              |                                                |                 |                                 |
|                            | Nucleotide          | XM_008188962                              |                                                |                 |                                 |
|                            | RNAi_AP_p300_fwd    |                                           | 5' <b>TZ</b> G TCT TGG TTA TTG CTG TGG TCG T3' | 367             | RNAi                            |
|                            | RNAi_AP_p300_rev    |                                           | 5' <b>TZ</b> T CAC CGC GCT TCT TCA AAC AGT3'   |                 |                                 |
|                            | RNAi_AP_p300_fwd_1  |                                           | 5' <b>TZ</b> AGC CAC CTG TCC CAA GTC CA3'      |                 | RNAi non-overlapping Fragment 1 |
|                            | RNAi_AP_p300_rev_1  |                                           | 5' <b>TZ</b> GGT ACA CTT GTA GTT GAT GGC AC3'  |                 |                                 |
|                            | RNAi_AP_p300_fwd_2  |                                           | 5' <b>TZ</b> GCG CTG GTG AAG TTG CTA TAC G3'   |                 | RNAi non-overlapping Fragment 2 |
|                            | RNAi_AP_p300_rev_2  |                                           | 5' <b>TZ</b> GCA TGC CCA AAT GTG AGC CA3'      |                 |                                 |
|                            | Rpl32_F             |                                           | 5'AGT ATC GCC CAA CAA TTA TCA3'                |                 | qPCR reference gene [1]         |
|                            | Rpl32_R             |                                           | 5'CTT GAA TCG TCT TCG GAC T3'                  |                 |                                 |
|                            | qPCR_AP_p300_fwd4   |                                           | 5'GTT GCG AAC TCT AGG TCA GAA TA3'             |                 | qPCR target gene                |
|                            | qPCR_AP_p300_rev4   |                                           | 5'GCT GTT GCA TTT GTT GTT GTT C3'              |                 |                                 |

**Table S2.** Statistical analysis of RNAi data for survival compared to the GFP control.

| Treatment                  | Mean survival [d] | Standard error [d] | Chi-square | Significance |
|----------------------------|-------------------|--------------------|------------|--------------|
| <b>Control (GFP)</b>       | 13.88             | 0.44               |            |              |
| <b>p300/CBP 3000 ng/μl</b> | 10.23             | 0.34               | 63.95      | p<0.0000     |
| <b>p300/CBP 1000 ng/μl</b> | 10.26             | 0.39               | 49.03      | p<0.0000     |
| <b>p300/CBP 250 ng/μl</b>  | 10.93             | 0.40               | 38.21      | p<0.0000     |
| <b>p300/CBP 50 ng/μl</b>   | 11.08             | 0.47               | 30.65      | p<0.0000     |

**Table S3.** Statistical analysis of RNAi data for start of reproduction compared to the GFP control.

| treatment           | Mean start [d] | Standard error [d] | Chi-square | significances |
|---------------------|----------------|--------------------|------------|---------------|
| Control (GFP)       | 4.93           | 0.07               |            |               |
| p300/CBP 3000 ng/μl | 5.13           | 0.25               | 9          | p=0.003       |
| p300/CBP 1000 ng/μl | 5.79           | 0.24               | 15.16      | p<0.0000      |
| p300/CBP 250 ng/μl  | 5.18           | 0.19               | 2.02       | ns            |
| p300/CBP 50 ng/μl   | 5.18           | 0.15               | 1.6        | ns            |

**Table S4.** Statistical analysis of RNAi data for average number of offspring compared to the GFP control.

| Treatment           | Mean number | Standard error | Kruskal-Wallis test value | Significances |
|---------------------|-------------|----------------|---------------------------|---------------|
| Control (GFP)       | 62.38       | 1.84           |                           |               |
| p300/CBP 3000 ng/μl | 11.11       | 0.81           | 317.24                    | p<0.000       |
| p300/CBP 1000 ng/μl | 11.84       | 1.17           | 306.36                    | p<0.000       |
| p300/CBP 250 ng/μl  | 21.38       | 1.42           | 209.96                    | p<0.000       |
| p300/CBP 50 ng/μl   | 23.02       | 1.31           | 184.17                    | p<0.000       |

**Table S5.** Reproductive parameters evaluated during the RNAi experiments including viviparous offspring determined by two-way ANOVA.

| Treatment           |                                  | Statistical parameters              | Significances |
|---------------------|----------------------------------|-------------------------------------|---------------|
| p300/CBP 3000 ng/μl | Aphid line (control vs p300/CBP) | df=1 mean square=463.702 F=98.235   | p<0.0000      |
|                     | Age of reproduction              | df=28 mean square=349.784 F=74.102  | p<0.0000      |
|                     | Aphid line x Age of reproduction | df=27 mean square=262.781 F=55.67   | p<0.0000      |
| p300/CBP 1000 ng/μl | Aphid line (control vs p300/CBP) | df=1 mean square=2462.32 F=596.994  | p<0.0000      |
|                     | Age of reproduction              | df=30 mean square=204.834 F=49.662  | p<0.0000      |
|                     | Aphid line x Age of reproduction | df=16 mean square=203.719 F=49.392  | p<0.0000      |
| p300/CBP 250 ng/μl  | Aphid line (control vs p300/CBP) | df=1 mean square=1829.640 F=373.094 | p<0.0000      |
|                     | Age of reproduction              | df=30 mean square=289.921 F=59.120  | p<0.0000      |
|                     | Aphid line x Age of reproduction | df= 17 mean square=167.724 F=34.202 | p<0.0000      |
| p300/CBP 50 ng/μl   | Aphid line (control vs p300/CBP) | df=1 mean square=1173.761 F=242.996 | p<0.0000      |
|                     | Age of reproduction              | df=30 mean square=297.476 F=61.584  | p<0.0000      |
|                     | Aphid line x Age of reproduction | df=20 mean square=132.424 F=27.415  | p<0.0000      |

**Table S6.** Statistical analysis of RNAi data for average number of premature offspring compared to the GFP control.

| Treatment                 | Mean number | Standard error | Kruskal-Wallis test value | Significances |
|---------------------------|-------------|----------------|---------------------------|---------------|
| Control (GFP)             | 0.43        | 0.05           |                           |               |
| p300/CBP 3000 ng/ $\mu$ l | 2.06        | 0.14           | -185.09                   | p<0.000       |
| p300/CBP 1000 ng/ $\mu$ l | 2.98        | 0.17           | -242.40                   | p<0.000       |
| p300/CBP 250 ng/ $\mu$ l  | 1.89        | 0.24           | -185.41                   | p<0.000       |
| p300/CBP 50 ng/ $\mu$ l   | 1.57        | 0.24           | -145.93                   | p<0.000       |

**Table S7.** Reproductive parameters evaluated during the RNAi experiments including premature offspring determined by two-way ANOVA.

| Treatment                 |                                  | Statistical parameters           | Significances |
|---------------------------|----------------------------------|----------------------------------|---------------|
| p300/CBP 3000 ng/ $\mu$ l | Aphid line (control vs p300/CBP) | df=1 mean square=0.836 F=5.994   | P=0.014       |
|                           | Age of reproduction              | df=28 mean square=2.472 F=17.722 | p<0.0000      |
|                           | Aphid line x Age of reproduction | df=21 mean square=3.745 F=26.848 | p<0.0000      |
| p300/CBP 1000 ng/ $\mu$ l | Aphid line (control vs p300/CBP) | df=1 mean square=8.954 F=41.950  | p<0.0000      |
|                           | Age of reproduction              | df=30 mean square=1.702 F=7.973  | p<0.0000      |
|                           | Aphid line x Age of reproduction | df=16 mean square=3.119 F=14.614 | p<0.0000      |
| p300/CBP 250 ng/ $\mu$ l  | Aphid line (control vs p300/CBP) | df=1 mean square=3.658 F=27.031  | p<0.0000      |
|                           | Age of reproduction              | df=30 mean square=0.823 F=6.083  | p<0.0000      |
|                           | Aphid line x Age of reproduction | df=17 mean square=1.237 F=9.144  | p<0.0000      |
| p300/CBP 50 ng/ $\mu$ l   | Aphid line (control vs p300/CBP) | df=1 mean square=0.842 F=6.774   | p<0.009       |
|                           | Age of reproduction              | df=30 mean square=0.643 F=5.171  | p<0.0000      |
|                           | Aphid line x Age of reproduction | df=20 mean square=0.924 F=7.435  | p<0.0000      |

**Table S8.** Statistical analysis of RNAi data for body weight [mg] compared to the GFP control (dsRNA concentration = 3000 ng/ $\mu$ l).

| Time after injection [d] | Body weight p300/CBP [mg] |                | Body weight GFP control [mg] |                | Significances |
|--------------------------|---------------------------|----------------|------------------------------|----------------|---------------|
|                          | Mean                      | Standard error | Mean                         | Standard error |               |
| <b>0</b>                 | 1                         | 0.02           | 0.92                         | 0.02           | ns            |
| <b>3</b>                 | 2.10                      | 0.07           | 2.07                         | 0.09           | ns            |
| <b>8</b>                 | 2.86                      | 0.09           | 2.89                         | 0.07           | ns            |

ns = not significant

**Table S9.** Statistical analysis of RNAi data for body size (length\*width)[mm<sup>2</sup>] compared to the GFP control (dsRNA concentration = 3000 ng/ $\mu$ l).

| Time after injection [d] | Body size p300/CBP [mm <sup>2</sup> ] |            | Body size GFP control [mm <sup>2</sup> ] |            | Significances |
|--------------------------|---------------------------------------|------------|------------------------------------------|------------|---------------|
|                          | mean                                  | Std. error | mean                                     | Std. error |               |
| <b>3</b>                 | 2.43                                  | 0.08       | 2.45                                     | 0.1        | ns            |
| <b>8</b>                 | 3.07                                  | 0.07       | 3.07                                     | 0.06       | ns            |

ns = not significant

**Table S10.** Statistical analysis of RNAi data for body color (grayscale) compared to the GFP control (dsRNA concentration = 3000 ng/ $\mu$ l).

| Time after injection [d] | Body color p300/CBP - grayscale |                | Body color GFP control - grayscale |                | Significances |
|--------------------------|---------------------------------|----------------|------------------------------------|----------------|---------------|
|                          | Mean                            | Standard error | Mean                               | Standard error |               |
| <b>3</b>                 | 107.22                          | 1.33           | 101.15                             | 1.56           | ns            |
| <b>8</b>                 | 75.59                           | 2.4            | 95.41                              | 0.95           | p<0.01        |

ns = not significant







AACATGTTAACTATGTAAGTCAAATCTAATGGCAACTGTCCGATTTGTAACAATATATTGCACCTTGCTTTCATCATGCTAAGTATTGTACTGAAGCTAAGTGTCCAGTGTGTTCTGTCCAAATATGAAACACAAGAT  
CAAACAGCAAACTTCAACAAAGACTGCAACAAGCACAGCTATTAAGAAGACGTATGGCTATTATGAATACTGGTACTTTAGGGACGGAAAAATACCACTCCTGTTGTAGCAACACAACATATGTCTAATCAAACATAA  
ATGATACCTCATAAAGGGCCAGTTATGGTCCAGGGAACAACACCCGCTGCCAATGTTTTACAAGTAGTTAAGCAAGTACAAGAAAGCGGCACGACACATGATAACGTGGGATATGGAAAAGGTGGTCTCAA  
CAACAGATGCAACGACCACATATGCAGATCGCTCCCCTGTTCCACAACAAGTCAATCAATGGGTTACTGAACCTAATTACAATCAAATGATGATGCAGCAGCAACAACAGCAACAACAACAACAACAACA  
AAACAACAACAACAACAGCAGCAGCAACAGCAAGCAACAACAAGTTCAACAGCAGCAAGCAAAATGAACATTCAACCTCAACAACAATGATACTCAATAACCCAAAAATCCAA  
TGCTTCAACAGCAACAAGTTATGACCTCCAGACCTCAAGGTTACCAAAAAACCCTAATCAACAAGTACCCTAACCAATCTTTACAACAGTTACTAAATGCACTGCGCACCAACACTGACAGTCCACCTGAACAGCAACA  
CGCCTAAGAGAGATTCTGAGGAGCAACCCACAGCTGTTGGCCCAATTCATTAGGAACCAACGACAAAGGCAATGTTCC

## References

1. Sapountzis, P.; Duport, G.; Balmand, S.; Gaget, K.; Jaubert-Possamai, S.; Febvay, G.; Charles, H.; Rahbé, Y.; Colella, S.; Calevro, F. New insight into the RNA interference response against cathepsin-L gene in the pea aphid, *Acyrtosiphon pisum*: Molting or gut phenotypes specifically induced by injection or feeding treatments. *Insect Biochemistry and Molecular Biology* **2014**, *51*, 20–32.
